## Disentangling key species interactions in diverse and heterogeneous communities: A Bayesian sparse modeling approach

Christopher P. Weiss-Lehman<sup>1,†,\*</sup>, Chhaya M. Werner<sup>1,\*</sup>, Catherine H. Bowler<sup>2</sup>, Lauren M. Hallett<sup>3,4</sup>, Margaret M. Mayfield<sup>2</sup>, Oscar Godoy<sup>5</sup>, Lina Aoyama<sup>3,4</sup>, György Barabás<sup>6</sup>, Chengjin Chu<sup>7</sup>, Emma Ladouceur<sup>8,9</sup>, Lorelee Larios<sup>10</sup>, Lauren G. Shoemaker<sup>1</sup>

† corresponding author: [cweissle@uwyo.edu](mailto:cweissle@uwyo.edu)

\* denotes equal contribution

<sup>1</sup> Botany Department, University of Wyoming, Laramie, Wyoming 82071 USA

<sup>2</sup> School of Biological Sciences University of Queensland, Brisbane, QLD, 4072, Australia

<sup>3</sup> Biology Department, University of Oregon, Eugene, OR 97403, USA

<sup>4</sup> Environmental Studies Program, University of Oregon, Eugene, OR 97403, USA

<sup>5</sup> Departamento de Biología, Instituto Universitario de Investigación Marina (INMAR), Universidad de Cádiz, E-11510 Puerto Real, Spain

<sup>6</sup> Division of Theoretical Biology, Dept. IFM, Linköping University, SE-58183 Linköping, Sweden

<sup>7</sup> Department of Ecology, State Key Laboratory of Biocontrol and School of Life Sciences, Sun Yat-sen University, 510275 Guangzhou, Guangdong, China

<sup>8</sup> German Centre for Integrative Biodiversity Research (iDiv) Leipzig-Halle-Jena, Puschstraße 4, 04103 Leipzig, Germany

<sup>9</sup> Department of Physiological Diversity, Helmholtz Centre for Environmental Research -UFZ, Permoserstrasse 15, 04318 Leipzig, Germany

<sup>10</sup> Department of Botany and Plant Sciences, University of California Riverside, Riverside, CA 92521

*Running Title:* Sparse modeling of community interactions

*Keywords:* parameter shrinkage, pairwise interactions, environmental gradients, species diversity, coexistence, plant fecundity

*Type of Article:* Method

*Number of Words:* Abstract: 145, Main text: 4987 words, Text Box: 527

*Number of References:* 60

*Number of Figures:* 4

*Number of Tables:* 1

*Number of Text Boxes:* 1

*Data accessibility statement:* Upon acceptance, all data will be archived on Dryad and the data DOI will be included at the end of the article. Model code is available on GitHub, with the URL included in the manuscript. Upon acceptance, model code will be archived on Zenodo and the URL will be updated with the Zenodo link.

*Statement of authorship:* CWL and CMW contributed equally. CWL developed and implemented the statistical approach with input from CMW, CHB, OG and LGS. CMW developed and implemented the simulations. Data was contributed by MM. CWL, CMW, LMH, and LGS wrote the first manuscript draft. The manuscript was developed through conversations with the entire author list and all authors contributed to manuscript edits.

## 1 Abstract

2 Modeling species interactions in diverse communities traditionally requires a prohibitively large number of  
3 species-interaction coefficients, especially when considering environmental dependence of parameters. We  
4 implemented Bayesian variable selection via sparsity-inducing priors on non-linear species abundance mod-  
5 els to determine which species-interactions should be retained and which can be represented as an average  
6 heterospecific interaction term, reducing the number of model parameters. We evaluated model performance  
7 using simulated communities, computing out-of-sample predictive accuracy and parameter recovery across  
8 different input sample sizes. We applied our method to a diverse empirical community, allowing us to dis-  
9 entangle the direct role of environmental gradients on species' intrinsic growth rates from indirect effects  
10 via competitive interactions. We also identified a few neighboring species from the diverse community that  
11 had non-generic interactions with our focal species. This sparse modeling approach facilitates exploration  
12 of species-interactions in diverse communities while maintaining a manageable number of parameters.

## 2 Introduction

13

14 Understanding what maintains the diversity of life—where and how species abundances change through  
15 time—has long fascinated and challenged ecologists. It is widely accepted that community composition in  
16 any given time and place is driven by the interplay of species interactions, responses to environmental con-  
17 ditions, and feedbacks between local and regional dynamics (Chesson, 2000; HilleRisLambers *et al.*, 2012;  
18 Vellend, 2020). However, given the myriad of biotic interactions that may, themselves, be mediated by under-  
19 lying environmental conditions (Bulleri *et al.*, 2016; Germain *et al.*, 2018; Letten *et al.*, 2018), feasibility and  
20 model overfitting concerns quickly arise when trying to incorporate observed levels of diversity. Arguably,  
21 the magnitude of this methodological limitation has even shaped our historical theoretical frameworks and  
22 empirical tests. For example, classic species trait trade-offs, such as the competition-colonization trade-off,  
23 apply for species pairs (Levins & Culver, 1971; Tilman, 1982). Similarly, while modern coexistence theory  
24 (Chesson, 2000) can be applied to any level of species richness (Spaak & De Laender, 2020), the vast ma-  
25 jority of empirical studies focus on pairwise species comparisons (e.g. Kraft *et al.* 2015; Wainwright *et al.*  
26 2019) and the effect of environmental variation on these comparisons (Bimler *et al.*, 2018; Lanuza *et al.*,  
27 2018). Yet nonlinearity, higher-order interactions, and intransitivity in diverse systems may yield complex  
28 dynamics that dramatically alter population growth and coexistence dynamics (Allesina & Levine, 2011; Li  
29 *et al.*, 2021; May & Leonard, 1975; Mayfield & Stouffer, 2017). The further development and empirical  
30 testing of these theories thus requires a statistical approach that is applicable in diverse communities and is  
31 capable of identifying and incorporating key species interactions and environmental covariates.

32 To date, empirical studies of population dynamics and species coexistence frequently take one of two  
33 approaches for dealing with parameterization limitations that arise in diverse communities and varied envi-  
34 ronments. In the first approach, experimental studies focus on a few focal species. For example, Wainwright  
35 *et al.* (2019) examined coexistence based on pairwise interaction coefficients between four annual forbs in  
36 two locations and across two water availability treatments—a lofty number of species interaction coefficients  
37 to estimate—but still a relatively small subset of the community’s full diversity (10 – 14 species in 0.09 m<sup>2</sup>;  
38 Dwyer *et al.* 2015). Finer-scale environmental variation can further limit the number of species that can be  
39 feasibly incorporated: in a study of grass and forb coexistence under variable rainfall regimes, Hallett *et*

40 al. (2019) considered four rainfall conditions, requiring estimates of eight distinct species interaction coef-  
41 ficients even with only two species. Isolating species interactions across environmental conditions is a high  
42 barrier in species rich communities, even in laboratory and microcosm based studies (Letten *et al.*, 2018).

43 In the second approach, often used to interpret observational data, species are grouped into broad cat-  
44 egories. At the most extreme, a single interaction coefficient is then calculated between the focal species  
45 and all heterospecific individuals—regardless of their identity (Clark *et al.*, 2020a; Uriarte *et al.*, 2004).  
46 Heterospecifics may also be grouped more finely, for example, according to their taxonomic relationship  
47 (Uriarte *et al.*, 2004) or their origin status and life form (e.g. native versus exotic and grasses versus forbs)  
48 (Martyn *et al.*, 2020). Alternatively, functional groups can be created by grouping species according to their  
49 traits (e.g. specific leaf area, canopy height, seed number) (Kühner & Kleyer, 2008; Uriarte *et al.*, 2004).  
50 However, this methodological approach often necessitates *a priori* knowledge of the system and makes an  
51 underlying assumption that species grouped together will interact similarly with each other and with the  
52 focal species. These assumptions are often not met (Mayfield & Levine, 2010), suggesting a need for a more  
53 parsimonious and robust methodology that would allow the data to inform species groupings.

54 Various alternative statistical approaches have been proposed to assess species interactions using obser-  
55 vational data. For example, joint species distribution modeling has become a common approach to infer  
56 species interactions from co-occurrence patterns (Legendre & Gauthier, 2014; Ovaskainen *et al.*, 2019,  
57 2017b). However, in addition to species interactions, patterns of co-occurrence may result from environ-  
58 mental sorting (Barner *et al.*, 2018), or dispersal patterns (Schamp *et al.*, 2015). Further, co-occurrence  
59 patterns are scale dependent and regional analyses are not suited to assessing local-scale species interactions  
60 (König *et al.*, 2021). Recognizing a need to directly estimate species interaction coefficients, recent work has  
61 expanded multivariate autoregressive models for use in more diverse communities (Picoche & Barraquand,  
62 2020), including examining which linear combinations of species abundances best predict future growth  
63 rates (Ovaskainen *et al.*, 2017a). This approach is effective for binning species based on their competitive  
64 effects, but does not account for variation in the environment. Clark *et al.* (2020b) recently developed a  
65 state-space hierarchical Bayesian model to assess the effect of environmental gradients on nonlinear species  
66 abundance patterns, incorporating environment responses in species' density-independent growth rates, but  
67 not in species interactions (Clark *et al.*, 2020b). Lastly, García-Callejas *et al.* (2020) developed a method to

68 incorporate environment responses in species' density-dependent growth rates but without the flexibility of  
69 Bayesian approaches. Independently, these different methodological developments each address one of the  
70 largest hurdles for modeling species abundances in diverse communities: (1) identifying important species  
71 interactions and (2) accounting for the mediating effect of the environment (here referred to as species-  
72 environment interactions). Addressing these two aspects simultaneously would solidify a path forward for  
73 characterizing species interactions in diverse communities and across environmental gradients.

74 Here, we present an approach for modeling dynamics in diverse communities and across environmental  
75 gradients. The approach balances realism and complexity without extensive experimental manipulation or  
76 *a priori* assumptions regarding species groupings. Our method is based on two innovations to standard  
77 population and community ecology models. First, we define heterospecific species interaction coefficients  
78 as linear combinations of the average interaction strength and species-specific deviations from this average.  
79 In parallel, we allow environmental covariates to modify species intrinsic growth rates and the strength  
80 of biotic interactions—both the average and species deviation terms. We implement this approach using  
81 a Beverton-Holt model of community dynamics (Beverton & Holt, 1957) within a single growing season,  
82 although the method can easily be adapted to other models of population abundance (e.g. Mayfield &  
83 Stouffer 2017; Ricker 1954) or incorporate additional dynamics such as seed banks or dispersal (Levine  
84 & HilleRisLambers, 2009; Thompson *et al.*, 2020). Second, we extend Bayesian statistical methods for  
85 variable selection via sparsity-inducing priors in linear models (such as Lasso and Ridge regression; Hastie  
86 *et al.* 2015; Piironen *et al.* 2017) to our non-linear abundance model, thereby reducing the number of terms  
87 included in the final model fit, yielding a 'sparse model.' By coupling these two modeling approaches, we  
88 can identify heterospecific species that deviate in their interaction strength, and how environmental gradients  
89 alter species' density-independent growth rates and biotic interactions. We explore model effectiveness  
90 using simulated data and apply the model to empirical data from a highly diverse (45 species) annual plant  
91 community.

## 3 Methods

### 3.1 Deconstructing species interaction coefficients and fecundity

Models of community dynamics incorporate species-specific interaction coefficients for each species pair, commonly denoted as  $\alpha_{i,j}$ , the effect of species  $j$  on species  $i$ , resulting in a large number of parameters required to model diverse communities or environmental relationships. To reduce the number of parameters required to model diverse communities and incorporate environmental variation, we start with a partitioning approach. We first define these interaction terms as

$$\ln(\alpha_{e,i,j}) = \bar{a}_{0,i} + \hat{a}_{0,i,j} + (\bar{a}_{e,i} + \hat{a}_{e,i,j})X_e \quad (1)$$

where  $\alpha_{e,i,j}$  is the effect of species  $j$  on species  $i$  in environment  $e$  with  $i \neq j$ . In Eqn. 1,  $\bar{a}_{0,i}$  is the effect of an average heterospecific individual on individuals of species  $i$ ,  $\hat{a}_{0,i,j}$  is the deviation from this average effect associated with species  $j$ ,  $\bar{a}_{e,i}$  is the average slope of species  $i$ 's interaction coefficients with environmental covariate  $X_e$ , and  $\hat{a}_{e,i,j}$  is the deviation from this slope associated with species  $j$ . Upon first glance, using Eqn. 1 may seem counter productive as it increases the number of parameters compared to traditional interaction coefficients. However, in the next section we describe how coupling this approach with sparsity inducing priors in a Bayesian context can dramatically reduce the number of required parameters by identifying only the necessary species-specific terms ( $\hat{a}_{0,i,j}$  and  $\hat{a}_{e,i,j}$ ) for accurately modeling population dynamics of species  $i$ .

While intraspecific competition ( $\alpha_{e,i,i}$ ) could in principle be modeled according to Eqn. 1, we instead define it separately as:

$$\ln(\alpha_{e,i,i}) = a_{0,i,i} + a_{e,i,i}X_e \quad (2)$$

where  $a_{0,i,i}$  and  $a_{e,i,i}$  are the intercept and slope for the effect of intraspecific individuals. As both theoretical expectations (Chesson, 2000) and empirical results (Adler *et al.*, 2018) point to the importance of intraspecific competition, we use Eqn. 2 to explicitly exclude the intraspecific terms from the sparsity inducing

113 process defined in the next section. These terms, therefore, will always be included in the final model fit.

114 Interaction coefficients (Eqns. 1 & 2) can be incorporated in many different models of community dy-  
115 namics. We use the Beverton-Holt model due to its legacy in studies of annual plant communities and  
116 coexistence theory (e.g. Godoy & Levine 2014; Kraft *et al.* 2015). We emphasize, however, that our general  
117 statistical approach can be adapted to other population models. In the Beverton-Holt model, the fecundity  
118  $F_{e,i}$  of a focal species  $i$  in environment  $e$  is modeled as:

$$F_{e,i} = \frac{\lambda_{e,i}}{1 + \alpha_{e,i,i}N_{e,i} + \sum_{j \neq i}^S \alpha_{e,i,j}N_{e,j}} \quad (3)$$

119 Fecundity depends on a species' intrinsic growth rate (i.e. density-independent seed production;  $\lambda_{e,i}$ )  
120 and the competitive effects of all  $S$  species in the community ( $\alpha_{e,i,j}$  terms as defined by Eqns. 1 & 2) scaled  
121 by each species' abundance ( $N_{e,j}$ ) (Levine & HilleRisLambers, 2009; Pérez-Ramos *et al.*, 2019; Shoemaker  
122 & Melbourne, 2016). To incorporate environmental variation in intrinsic growth rates, we model  $\lambda_{e,i}$  as:

$$\ln(\lambda_{e,i}) = b_{0,i} + b_{e,i}X_e \quad (4)$$

123 where  $b_{0,i}$  is the intercept of the intrinsic growth rate and  $b_{e,i}$  its slope with environmental covariate  $X_e$ .  
124 We use Eqn. 3 to model observed fecundity within a single growing season of both simulated and empirical  
125 data.

### 126 3.2 Incorporating sparsity-inducing priors

127 By deconstructing interaction coefficients into a combination of species-specific and generic terms, we can  
128 determine which, if any, species-specific terms are necessary for the final model. Allowing only a subset of  
129 parameters to take non-zero values is referred to as 'sparse modeling,' and various techniques exist to induce  
130 sparsity in linear models (Hastie *et al.*, 2015; O'Hara *et al.*, 2009).

131 To extend a sparse modeling approach to our non-linear model of fecundity (Eqn. 3), we employ sparsity-  
132 inducing priors which act to shrink all but a subset of parameters to 0, thus producing a sparsely parame-  
133 terized model. Specifically, we model  $\hat{a}_{0,i,j}$  and  $\hat{a}_{0,i,j}$ , the species-specific intercepts and slopes of the inter-



134 specific interaction coefficients (Eqn. 1), with regularized horseshoe priors which more accurately estimate  
135 large parameter values compared to other sparsity-inducing priors (Bhadra *et al.*, 2019; Carvalho *et al.*, 2009;  
136 Piironen *et al.*, 2017; Van Erp *et al.*, 2019). Parameters  $\hat{a}_{i,j}$  and  $\hat{a}_{e,i,j}$ , are given priors  $\text{Normal}(0, \tau\tilde{\beta}_{0,j})$  and  
137  $\text{Normal}(0, \tau\tilde{\beta}_{e,j})$  respectively. (Note that since we fit the model for a single focal species, we drop the  $i$   
138 subscript from the priors for simplicity.) In these priors,  $\tau$  defines the global tendency towards sparsity  
139 through its effect on the priors' standard deviations. In other words, with smaller values of  $\tau$ , the priors for  
140 all  $\hat{a}_{i,j}$  and  $\hat{a}_{e,i,j}$  parameters become more tightly centered on 0. Conversely, the  $\tilde{\beta}$  terms allow specific pa-  
141 rameters to escape this global trend towards sparsity. As an individual  $\tilde{\beta}$  term becomes large, its associated  
142 prior becomes wider, and that species-specific term is more likely to be included in the final model. In the  
143 regularized horseshoe prior, these  $\tilde{\beta}$  terms are defined as:

$$\begin{aligned}\tilde{\beta}_j &= \frac{c\beta_j}{\sqrt{c^2 + \tau\beta_j^2}} \\ \beta_j &\sim \text{half-Cauchy}(0, 1) \\ c^2 &\sim \text{inverse-gamma}\left(\frac{\nu}{2}, \frac{\nu s^2}{2}\right)\end{aligned}\tag{5}$$

144 Defining  $\tilde{\beta}_j$  as the combination of a half-Cauchy and inverse-gamma distribution causes large coefficients to  
145 be shrunk towards 0 by a Student's  $t$  distribution with  $\nu$  degrees of freedom and a scale of  $s^2$  (Piironen *et al.*,  
146 2017; Van Erp *et al.*, 2019). Following the recommendations of Piironen and Vehtari (2017), we set  $\nu$  to 4  
147 and  $s^2$  to 2. Rather than setting the global shrinkage parameter  $\tau$  to a fixed value, we give it a half-Cauchy  
148 prior with scale parameter equal to 1 ( $\tau \sim \text{half-Cauchy}(0, 1)$ ) and allow the data to inform the posterior  
149 distribution of  $\tau$  (Piironen *et al.*, 2017; Van Erp *et al.*, 2019).

150 We employ a hybrid approach in which we first fit the full model with regularized horseshoe priors to  
151 induce sparsity in the species-specific terms; we subsequently fit a final model using traditional, non-sparse  
152 methods. From the preliminary model fit, we identify which species-specific terms have sufficient evidence  
153 to be included in the final model fit. We calculate credible intervals (CIs) for each species-specific term in  
154 the preliminary model and include in the final model only those terms whose intervals do not overlap 0. By

155 using this approach, we can directly adjust how conservative we wish to be in including model parameters,  
156 balancing model prediction, the proportion of variance explained, and simplicity depending on modeling  
157 goals (Tredennick *et al.*, 2021) (i.e. using a 50% CI will lead to models including more parameters than if  
158 we use a 95% CI). Then, for the final model fit, the included species-specific terms ( $\hat{a}_{0,i,j}$  and  $\hat{a}_{e,i,j}$ ) are given  
159 standard normal priors (i.e.  $\text{Normal}(0, 1)$ ). In both preliminary and final model fits, the terms defining  $\lambda_{e,i}$   
160 ( $b_{0,i}$  and  $b_{e,i}$ ; Eqn 4) are also given standard normal priors. The intercept and slope terms defining intraspe-  
161 cific competition ( $a_{0,i,i}$  and  $a_{e,i,i}$ ; Eqn.2) and the generic intercept and slope defining interspecific competition  
162 ( $\bar{a}_{0,i}$  and  $\bar{a}_{e,i}$ ; Eqn. 1) are both given weakly informative priors in each model fit, matching the expected scale  
163 of these interaction coefficients:  $a_{0,i,i} \sim \text{Normal}(-6, 3)$ ,  $\bar{a}_{0,i} \sim \text{Normal}(-6, 3)$ ,  $a_{e,i,i} \sim \text{Normal}(0, 0.5)$ , and  
164  $\bar{a}_{e,i} \sim \text{Normal}(0, 0.5)$ . All models were fit using the stan language with the rstan package (version 2.18.2;  
165 Stan Development Team 2018 in R (version 3.5.3; R Core Team 2019). All code for the analyses and  
166 simulations presented here can be found at <https://github.com/tpweiss06/SparseInteractions>.

### 167 3.3 *Simulation tests of model performance*

168 To test our ability to predict changes in population size and recover true parameter values, we first paired  
169 our Bayesian sparse modeling approach with simulated Beverton-Holt data using Eqns. 1-4. For the simu-  
170 lations, we generated communities of 15 species in different plots, where each plot was a unique run of the  
171 simulation for a given community with a given environmental condition  $X_e$ . We aimed to generate popula-  
172 tion growth rates comparable to those found in a community adapted to its environment. Each species was  
173 assigned an intrinsic growth rate  $\lambda_{e,i}$  following Eqn 4 (Table 1), pairwise species competitive interactions  
174  $\alpha_{e,i,j}$  were composed of the generic competition term  $\bar{a}_{0,i}$  with small amounts of variation and a generic envi-  
175 ronmental response  $\bar{a}_{e,i}$ . Seven randomly selected species also had a non-generic competition term through  
176 species-specific deviations from  $\bar{a}_{0,i}$  ( $\hat{a}_{0,i,j}$ ). Seven separately selected species had a non-generic environ-  
177 mental response through species-specific deviations  $\hat{a}_{e,i,j}$ . Intraspecific competition  $\bar{a}_{0,i,i}$  was set as a fixed  
178 value higher than interspecific competition to minimize extinction in the simulations (Table 1). Each plot  
179 simulation was run deterministically for 20 time steps with each time step  $N_{t+1} = F_t N_t$  using  $F_t$  from equa-  
180 tion 3. This resulted in some subset of the 15 species remaining with populations greater than zero in each

181 plot. Then each population was perturbed by drawing from a normal distribution with mean and standard  
182 deviation equal to the previous population size, truncated at 0 to prevent negative population sizes. This per-  
183 turbed state and the following time step generated our simulated ‘full-community’ data. In addition to 500  
184 full-community plots, we simulated 500 ‘no-competition’ treatments with a single phytometer individual of  
185 the focal species per plot, running the Beverton-Holt function for one time step. This simulated treatment  
186 matches methods commonly used in experimental studies to parse intrinsic growth rates from competition  
187 parameters (Hallett *et al.*, 2019; Wainwright *et al.*, 2019). Simulation details are included in Supplement 1.

188 We used these simulations to measure our sparse modeling approach’s ability to predict population  
189 growth in diverse communities and recover underlying parameters. We selected one focal species and tested  
190 our model’s performance using varying numbers of full-community and no-competition plots. We tested  
191 out-of-sample predictions on 200 full-community plots not used to fit the model. We then calculated the  
192 posterior distribution of the root-mean-square error (RMSE) of model predictions compared to true values  
193 for each model fit. This allowed us to quantify the gain in predictive accuracy resulting from including more  
194 data.

### 195 3.4 Empirical application

196 We additionally applied our model to species interactions and their environmental dependencies in the an-  
197 nual plant understory of the York gum (*Eucalyptus loxophleba* Benth) - jam (*Acacia acuminata*) woodlands  
198 of southwestern Western Australia. This community is highly diverse and heterogeneous, with local compo-  
199 sition of annual forbs and grasses influenced by gradients in soil nutrients and shade from York gum and jam  
200 trees (Dwyer *et al.*, 2015; Lai *et al.*, 2015). We focused on two York gum-jam woodland remnants: West  
201 Perenjori Nature Reserve (29°47’S, 116°20’E) and Bending Nature Reserve (32°23’S, 118°22’E). Both  
202 sites experience a Mediterranean climate with mild winters and long, dry summers (Suppiah *et al.*, 2007)  
203 and have high overlap in annual species composition, sharing several dominant species. Data used for this  
204 study were originally collected as part of a larger experiment described in full in Wainwright *et al.* (2019).  
205 We focus on two species used as focal species in the original study and common to both reserves: *Waitzia*  
206 *acuminata*, an abundant native annual forb, and *Arctotheca calendula*, a prevalent exotic annual forb.

207 We used data from 11 experimental blocks in Bending Nature Reserve and 18 blocks in West Perenjori  
208 Nature Reserve. Each block was  $\approx 15 \times 15$  m, a size selected to account for previously identified soil-nutrient  
209 turn-over rates (Dwyer *et al.*, 2015). Each block was split into  $50 \times 50$  cm plots and each plot was further  
210 subdivided into four  $25 \times 25$  cm quadrats. One individual of either focal species near the center of each  
211 quadrat was assigned as the focal individual for that quadrat. Which focal species were in a given quadrat  
212 depended on the natural distribution of individuals. This experiment employed five thinning treatments at  
213 the plot level to manipulate local community compositions (individual focal individuals with no competitors,  
214 native dominated competitors, exotic dominated competitors, monocultures with only conspecific competi-  
215 tors, and unmanipulated plots) (Wainwright *et al.*, 2019). This ensured a range of observed densities of both  
216 species and the background communities to inform model estimates of competition coefficients and intrinsic  
217 growth rates. Across both reserves we used data from 129 focal individuals in 69 plots interacting with 45  
218 neighbouring species for *W. acuminata* and 95 focal individuals in 54 plots interacting with 40 species for  
219 *A. calendula*.

220 We applied our sparse modeling framework to quantify the effect of the competitive environment on  
221 fecundity in *W. acuminata* and *A. calendula* under different environmental conditions. Fecundity  $F_{e,i}$  was  
222 measured as the number of flowers produced by each focal individual. The competitive environment was  
223 characterized as the number of individuals of each interacting species in the quadrat after the experimental  
224 treatment had been applied ( $N_{e,j}$ ). We considered two aspects of the physical environment  $X_e$ : percent  
225 overhead tree canopy cover, measured at the plot scale, and soil Colwell P (mg/kg), measured at the block  
226 scale. Both environmental covariates were standardized for inclusion in the model. We ran a separate model  
227 for each focal species and environmental covariate, for a total of four model fits. To account for regional  
228 differences between the Bending and Perenjori reserves, we incorporated a fixed effect for the two different  
229 reserves into our sparse modeling approach by allowing  $\lambda_i$ ,  $\lambda_{e,i}$ ,  $\hat{\alpha}_{i,j}$ , and  $\hat{\alpha}_{e,i,j}$  to differ between reserves.  
230 Using this approach, we quantified  $\lambda_{e,i}$  and  $\alpha_{e,i,j}$  for both species across both environmental gradients in the  
231 York gum-jam woodland communities.

## 4 Results

### 4.1 Simulations

Our model accurately predicted growth rates for simulated communities even with relatively low sample sizes (Fig. 1) and across different model formalizations (Box 1). With only 10 full-community and 10 no-competition plots, the model predicted growth rates with a root-mean-square error (RMSE) of 0.495 (credible interval, CI: 0.353-0.665). While increasing sample size further increased model accuracy (RMSE of 0.315 (CI: 0.211-0.520) for 50 plots and 0.227 (CI 0.195-0.288) for 200 plots), these results indicate the model can accurately predict species' realized growth rates using limited data. Furthermore, species' growth rates can be accurately predicted using observed competitive communities paired with no-competition plots, rather than necessitating common manipulative experimental designs where each possible species combination is paired across a gradient of densities (Hallett *et al.*, 2019; Kraft *et al.*, 2015).

Our model was also able to accurately predict individual parameter estimates for simulated communities (Fig. 1). In particular, estimates of the intercept and slope parameters for intrinsic growth rate ( $b_{0,i}$  and  $b_{e,i}$  respectively) dramatically increased in accuracy from 10 to 200 data points (Fig. 1a,e). The accuracy of the estimates for the slope and intercept of intraspecific competition ( $a_{0,i,i}$  and  $a_{e,i,i}$  respectively) also increased with more data, but less dramatically than the terms defining intrinsic growth rate. Parameters associated with interspecific competition ( $\bar{a}_{0,i}$  representing the intercept and  $\bar{a}_{e,i}$  for the slope) also increased in accuracy with increasing data, although there was more variance in this relationship. This is likely because the model correctly identified a larger number of species-specific terms with more data, which decreased the total number of species contributing to the estimation of  $\bar{a}_{0,i}$  and  $\bar{a}_{e,i}$ . When fit to only 10 simulated plots, the model did not identify any species-specific terms ( $\hat{a}_{0,i,j}$  or  $\hat{a}_{e,i,j}$ ) and only used  $\bar{a}_{0,i}$  and  $\bar{a}_{e,i}$ . The model identified two species-specific terms within a single species when fit to 50 plots and eight species-specific terms across six species when fit to 200 plots. In general, the estimates of species-specific terms were highly accurate; only two out of the eight estimated species-specific interaction terms did not include the true value in their 95% credible intervals.

## 4.2 Empirical application

Our method identified environmental dependencies in intrinsic growth rates (Fig. 3a,b; 4, a,b), relative strengths of intraspecific competition and average interspecific competition, along with competition-environment interactions (Fig. 3c,d; 4, c,d), all of which differed between our two focal species. Additionally, our model highlighted three species with deviations from the average interspecific effects on native *W. acuminata*, but no such species when fit to data on exotic *A. calendula*.

*W. acuminata* and *A. calendula*'s intrinsic growth rates differed in their relationship with the environmental gradients and reserves. The intrinsic growth rate of *W. acuminata* across both environmental gradients varied between the Bendering and Perenjori reserves (Fig. 3a,b). In contrast,  $\lambda_{e,i}$  for *A. calendula* was quite similar between the two reserves as it varied with both phosphorous and canopy cover (Fig. 4a,b). This could reflect local adaptation in regional populations of the native *W. acuminata* but not in the newly introduced *A. calendula*. Importantly, the intrinsic growth rate of *W. acuminata* declined with high phosphorous (marginally in Bendering, but substantially in Perenjori) while *A. calendula*'s intrinsic growth rate increased with phosphorous, potentially explaining the high prevalence of invasive species in areas with increased phosphorous (Dwyer *et al.*, 2015).

Relative effects of competition between conspecifics versus heterospecifics also differed between the two focal species. For *W. acuminata*, the relationship between intraspecific competition and average interspecific competition varied with the underlying environmental gradients. At low levels of phosphorous and high levels of canopy cover, intraspecific competition in *W. acuminata* was greater than average interspecific competition (Fig. 3c,d). However, at high levels of phosphorous and low levels of canopy cover, intra- and interspecific competition converged to similar values. On the other hand, intraspecific competition for *A. calendula* was similar to or lower than generic interspecific competition across both environmental gradients (Fig. 4c,d). This likely contributes to the invasive status of *A. calendula* in this ecosystem, whereas *W. acuminata* populations self-regulate under certain environmental conditions—a necessary component of stable coexistence.

Our model highlighted multiple species with competitive effects on *W. acuminata* that differed from the generic interaction term. Across the observed gradient in phosphorous, *Hyalosperma glutinosum* had

284 a higher than average effect on *W. acuminata* in the Perenjori reserve while *Schoenus nanus* had a lower  
285 than average effect in the Bending reserve (Fig. 3c). Across the observed gradient in canopy cover,  
286 *Hypochaeris glabra* had a much higher than average effect on *W. acuminata* in Bending (Fig. 3d). In  
287 contrast, all heterospecific interactive effects on *A. calendula* remained grouped in the generic competition  
288 term. The lack of species with unique effects on *A. calendula* (Fig. 4c,d) could be due to its exotic status  
289 (Lai *et al.*, 2015). With no shared evolutionary history with any other community members, *A. calendula*  
290 could be experiencing a form of competitive release, wherein the identity of competitor species matters less  
291 than simply the presence of additional individuals.

## 292 5 Discussion

293 Given the inherent complexity of ecological communities, ecologists are often forced to rely on simplify-  
294 ing assumptions in order to perform tractable analyses, such as limiting the number of species considered  
295 or ignoring environmental variation. The sparse modeling approach presented here provides an alternative  
296 method to analyze community data without requiring extensive additional data or sacrificing complexity.  
297 This approach enabled us to accurately predict population growth rates with limited data and identify how  
298 species' demographic rates and competitive interactions depend on the environment. Our results identify en-  
299 vironment by species interactions that deviate from the species-averaged community effects without making  
300 *a priori* assumptions about species groupings (Figure 3c, d). This information and output from the sparse  
301 modeling approach generates concrete, testable hypotheses about species interactions and environmental  
302 conditions. We see broad potential for this method's implementation in community ecology, from theory  
303 development to management applications.

304 The sparse modeling approach's flexibility in modeling populations and communities allows easy ad-  
305 justments for the best match between underlying model structure and the given study system and research  
306 questions. As we show in Box 1 and Fig. 2, these models can successfully be applied to different forms of  
307 species-environment interactions and be modified to be more or less complex based on underlying ecolog-  
308 ical questions and data availability. For example, the functional form of the relationship between intrinsic  
309 growth rate and the environment likely depends on a study's spatial scale. For localized studies, a sim-

310 ple monotonic relationship (Figure 2a) might be appropriate to capture species' expected responses across  
311 a small range of environmental variation. However, studies over larger spatial scales might require a func-  
312 tional form with optimal intrinsic growth reached at an intermediate environmental value and declining away  
313 from that value (Figure 2b), mimicking expected patterns of adaptation across species' ranges (Angert *et al.*,  
314 2020). Additionally, while we used a Beverton-Holt framework in our examples (Beverton & Holt, 1957),  
315 the sparse approach is agnostic to the underlying ecological model. Thus, it could be used with different  
316 functional forms of competition (García-Callejas *et al.*, 2020) with models incorporating both competitive  
317 and facilitative interactions (Stachowicz, 2001) or different underlying demography such as seed banks.

318 With this flexibility, sparse modeling has the potential to be a powerful tool to accelerate the develop-  
319 ment of community ecology theory and practice. It can provide important insights into the covariation of  
320 environmental conditions, species' demographic rates, and competitive effects—critical aspects of modern  
321 coexistence theory (Chesson, 2000). This includes quantifying the relative strengths of intra- versus inter-  
322 specific competition, which is a key condition for stable coexistence (Adler *et al.*, 2018; Chesson, 2000).  
323 Furthermore, the approach elucidates the effect of environmental conditions on species' density-independent  
324 growth rates versus competitive interactions, potentially allowing for quantification of variation-dependent  
325 coexistence mechanisms, such as the storage effect, in diverse communities (Chesson, 2000). Similarly, out-  
326 put from our sparse modeling approach across environmental gradients can be used to quantify the relative  
327 importance of environmental (abiotic) filtering, biotic interactions, and the joint effect on species occurrence  
328 (Cadotte & Tucker, 2017). Applying such an approach is especially exciting for linking community theory  
329 to global change predictions, depending on the underlying environmental gradient of interest.

330 In addition to expanding theory, we see exciting potential for sparse modeling to address questions in  
331 applied contexts and generate new hypotheses from existing datasets that inform management strategies.  
332 This includes quantifying how environmental modifications can be used in conjunction with community  
333 manipulations to control invasive species or promote native species. For example, our results from the York  
334 gum-jam woodlands of Western Australia suggest the native *W. acuminata* experiences declining fitness  
335 with increasing levels of phosphorous, particularly in the Perenjori reserve (Fig. 3a). At the same time,  
336 the model identified *H. glutinosum* as having a stronger than average competitive impact on *W. acuminata*  
337 in Perenjori (Fig. 3c). Taken together, these results suggest that reserve managers could help maintain or



338 expand populations of *W. acuminata* by mitigating phosphorous run-off while simultaneously removing *H.*  
339 *glutinosum* in key locals. In contrast, our results for the invasive *A. calendula* suggest that neighbor species  
340 identity is unimportant (Fig. 4c,d) and management strategies focusing solely on environmental factors  
341 would be most impactful.

342 Beyond the implementation of the sparse modeling approach presented here, the underlying model struc-  
343 ture can be further adjusted to align the model with focal management questions. For example, if a manage-  
344 ment goal only requires knowledge of species interactions within a community, the model could be simplified  
345 to remove environmental covariates (Box 1). Alternatively, the global shrinkage parameter  $\tau$  could be set at  
346 a fixed value to induce more or less sparsity in the final model results. Such a change could allow users to  
347 manually explore the trade-off between inclusion of species-specific terms and precision of parameter esti-  
348 mates, finding the balance that best suits their particular goals. For example, fixing  $\tau$  to a higher value would  
349 yield more estimates of species-specific parameters, which could help to inform future research priorities,  
350 but those estimates would likely be less precise, limiting their utility in predicting community dynamics.  
351 Small adjustments such as these empower ecologists and managers to match the tool to their questions and  
352 aims.

353 In its current structure, the sparse modeling framework is most useful when applied to high-diversity  
354 communities with limited available data. As we observed when analyzing simulated data, the number of  
355 non-generic terms does not necessarily increase with sample size, and is limited by  $\tau$  at higher sample sizes  
356 (Figure 2d). As described above, there may be cases where manual adjustments to  $\tau$  would be beneficial  
357 depending on the available data and questions of interest. However, a traditional, non-sparse model in  
358 which every interaction term is included may still be preferable in situations with abundant data, lower-  
359 diversity communities, or when answering questions requiring individual estimates of all potential species  
360 interactions. In contrast, the sparse approach is particularly helpful with limited data and in cases where  
361 traditional models often struggle to converge or provide overly broad parameter estimates.

362 The model we present here is currently analyzed for a single growing season and for use with traditional  
363 population dynamic models (e.g. Beverton-Holt or Lotka-Volterra models). Given the importance of temporal  
364 stochasticity to community dynamics (Shoemaker *et al.*, 2020) and the need to predict community responses  
365 to changing anthropogenic pressures (Ma *et al.*, 2017), sparse modeling with time series could provide

366 invaluable insight into the importance of species-specific interactions through time as well as space. Further,  
367 extending the approach to a wider range of input data beyond individual counts (e.g. percent cover or  
368 biomass) would allow for future uses across observational datasets and especially for perennial-dominated  
369 systems.

370 Sparse modeling approaches have proved immensely valuable in fields as diverse as genomics (Gianola  
371 & Fernando, 2020) to economics (Fan *et al.*, 2011). By dramatically reducing the parameter load required  
372 to model diverse communities across environmental gradients, we show these sparse modeling approaches  
373 can provide both theoretical and applied insights in community ecology as well. We demonstrate the flex-  
374 ibility of this approach across different ecological models and underlying biological assumptions, and are  
375 excited to see it expanded and applied to a variety of ecological questions and applications. Although the  
376 implementation of the sparse method requires an initial conceptual investment, the output results are easily  
377 interpretable—a quality that is particularly important for linking models to practice. The sparse modeling  
378 approach eliminates the need for *a priori* assumptions regarding species' groupings or the exclusion of all  
379 but a handful of focal species, providing a critical method and step forward in expanding ecological theory  
380 and linking models to observational and experimental datasets of diverse communities.

## 381 **6 Acknowledgements**

382 This paper is a joint effort of the working group sToration kindly supported by sDiv, the Synthesis Centre of  
383 the German Centre for Integrative Biodiversity Research (iDiv) Halle-Jena-Leipzig, funded by the German  
384 Research Foundation (FZT 118, 02548816). CWL, CMW, LGS were supported by Modelscapes, NSF award  
385 #EPS-2019528. OG was supported by the Spanish Ministry of Economy and Competitiveness (MINECO)  
386 and by the European Social Fund through the Ramón y Cajal Program (RYC-2017- 23666); GB was sup-  
387 ported by the Swedish Research Council (Vetenskapsrådet), grant 2017-05245. MMM was supported by the  
388 Australian Research Council (DP140100574).

## Literature Cited

389

390 Adler, P. B., Smull, D., Beard, K. H., Choi, R. T., Furniss, T., Kulmatiski, A., Meiners, J. M., Treden-  
391 nick, A. T. & Veblen, K. E. (2018). Competition and coexistence in plant communities: intraspecific  
392 competition is stronger than interspecific competition. *Ecology letters*, 21, 1319–1329.

393 Allesina, S. & Levine, J. M. (2011). A competitive network theory of species diversity. *Proceedings of the*  
394 *National Academy of Sciences*, 108, 5638–5642.

395 Angert, A. L., Bontrager, M. G. & Ågren, J. (2020). What do we really know about adaptation at range  
396 edges? *Annual Review of Ecology, Evolution, and Systematics*, 51, 341–361.

397 Barner, A. K., Coblenz, K. E., Hacker, S. D. & Menge, B. A. (2018). Fundamental contradictions among  
398 observational and experimental estimates of non-trophic species interactions. *Ecology*, 99, 557–566.

399 Beverton, R. J. & Holt, S. J. (1957). *On the dynamics of exploited fish populations*, vol. 11. Ministry of  
400 Agriculture, Fisheries and Food.

401 Bhadra, A., Datta, J., Polson, N. G., Willard, B. *et al.* (2019). Lasso meets horseshoe: A survey. *Statistical*  
402 *Science*, 34, 405–427.

403 Bimler, M. D., Stouffer, D. B., Lai, H. R. & Mayfield, M. M. (2018). Accurate predictions of coexistence in  
404 natural systems require the inclusion of facilitative interactions and environmental dependency. *Journal*  
405 *of Ecology*, 106, 1839–1852.

406 Bulleri, F., Bruno, J. F., Silliman, B. R. & Stachowicz, J. J. (2016). Facilitation and the niche: implications  
407 for coexistence, range shifts and ecosystem functioning. *Functional Ecology*, 30, 70–78.

408 Cadotte, M. W. & Tucker, C. M. (2017). Should environmental filtering be abandoned? *Trends in ecology*  
409 *& evolution*, 32, 429–437.

410 Carvalho, C. M., Polson, N. G. & Scott, J. G. (2009). Handling sparsity via the horseshoe. In: *Artificial*  
411 *Intelligence and Statistics*.

- 412 Chesson, P. (2000). Mechanisms of maintenance of species diversity. *Annual Review of Ecology and Sys-*  
413 *tematics*, 31, 343–366.
- 414 Clark, A. T., Ann Turnbull, L., Tredennick, A., Allan, E., Harpole, W. S., Mayfield, M. M., Soliveres, S.,  
415 Barry, K., Eisenhauer, N., de Kroon, H. *et al.* (2020a). Predicting species abundances in a grassland  
416 biodiversity experiment: Trade-offs between model complexity and generality. *Journal of ecology*, 108,  
417 774–787.
- 418 Clark, J. S., Scher, C. L. & Swift, M. (2020b). The emergent interactions that govern biodiversity change.  
419 *Proceedings of the National Academy of Sciences*, 117, 17074–17083.
- 420 Dwyer, J. M., Hobbs, R. J., Wainwright, C. E. & Mayfield, M. M. (2015). Climate moderates release from  
421 nutrient limitation in natural annual plant communities. *Global Ecology and Biogeography*, 24, 549–561.
- 422 Fan, J., Lv, J. & Qi, L. (2011). Sparse high-dimensional models in economics. *Annu. Rev. Econ.*, 3, 291–317.
- 423 García-Callejas, D., Godoy, O. & Bartomeus, I. (2020). cxr: A toolbox for modelling species coexistence in  
424 *r*. *Methods in Ecology and Evolution*, 11, 1221–1226.
- 425 Germain, R. M., Mayfield, M. M. & Gilbert, B. (2018). The ‘filtering’ metaphor revisited: competition and  
426 environment jointly structure invasibility and coexistence. *Biology letters*, 14, 20180460.
- 427 Gianola, D. & Fernando, R. L. (2020). A multiple-trait bayesian lasso for genome-enabled analysis and  
428 prediction of complex traits. *Genetics*, 214, 305–331.
- 429 Godoy, O. & Levine, J. M. (2014). Phenology effects on invasion success: insights from coupling field  
430 experiments to coexistence theory. *Ecology*, 95, 726–736.
- 431 Hallett, L. M., Shoemaker, L. G., White, C. T. & Suding, K. N. (2019). Rainfall variability maintains  
432 grass-forb species coexistence. *Ecology Letters*, 22, 1658–1667.
- 433 Hastie, T., Tibshirani, R. & Wainwright, M. (2015). *Statistical learning with sparsity: the lasso and gener-*  
434 *alizations*. CRC press.

- 435 HilleRisLambers, J., Adler, P. B., Harpole, W., Levine, J. M. & Mayfield, M. M. (2012). Rethinking commu-  
436 nity assembly through the lens of coexistence theory. *Annual review of ecology, evolution, and systematics*,  
437 43, 227–248.
- 438 König, C., Wüest, R. O., Graham, C. H., Karger, D. N., Sattler, T., Zimmermann, N. E. & Zurell, D. (2021).  
439 Scale dependency of joint species distribution models challenges interpretation of biotic interactions.  
440 *Journal of Biogeography*.
- 441 Kraft, N. J., Godoy, O. & Levine, J. M. (2015). Plant functional traits and the multidimensional nature of  
442 species coexistence. *Proceedings of the National Academy of Sciences*, 112, 797–802.
- 443 Kühner, A. & Kleyer, M. (2008). A parsimonious combination of functional traits predicting plant response  
444 to disturbance and soil fertility. *Journal of Vegetation Science*, 19, 681–692.
- 445 Lai, H. R., Mayfield, M. M., Gay-des combes, J. M., Spiegelberger, T. & Dwyer, J. M. (2015). Distinct  
446 invasion strategies operating within a natural annual plant system. *Ecology Letters*, 18, 336–346.
- 447 Lanuza, J. B., Bartomeus, I. & Godoy, O. (2018). Opposing effects of floral visitors and soil conditions on the  
448 determinants of competitive outcomes maintain species diversity in heterogeneous landscapes. *Ecology*  
449 *Letters*, 21, 865–874.
- 450 Legendre, P. & Gauthier, O. (2014). Statistical methods for temporal and space–time analysis of community  
451 composition data. *Proceedings of the Royal Society B: Biological Sciences*, 281, 20132728.
- 452 Letten, A. D., Dhami, M. K., Ke, P.-J. & Fukami, T. (2018). Species coexistence through simultaneous  
453 fluctuation-dependent mechanisms. *Proceedings of the National Academy of Sciences*, 115, 6745–6750.
- 454 Levine, J. M. & HilleRisLambers, J. (2009). The importance of niches for the maintenance of species  
455 diversity. *Nature*, 461, 254.
- 456 Levins, R. & Culver, D. (1971). Regional coexistence of species and competition between rare species.  
457 *Proceedings of the National Academy of Sciences*, 68, 1246–1248.

- 458 Li, Y., Mayfield, M. M., Wang, B., Xiao, J., Kral, K., Janik, D., Holik, J. & Chu, C. (2021). Beyond  
459 direct neighbourhood effects: higher-order interactions improve modelling and predicting tree survival  
460 and growth. *National Science Review*, 8, nwaa244.
- 461 Ma, Z., Liu, H., Mi, Z., Zhang, Z., Wang, Y., Xu, W., Jiang, L. & He, J.-S. (2017). Climate warming reduces  
462 the temporal stability of plant community biomass production. *Nature Communications*, 8, 1–7.
- 463 Martyn, T. E., Stouffer, D. B., Godoy, O., Bartomeus, I., Pastore, A. & Mayfield, M. M. (2020). Identifying  
464 ‘useful’ fitness models: balancing the benefits of added complexity with realistic data requirements in  
465 models of individual plant fitness. *the American Naturalist*.
- 466 May, R. M. & Leonard, W. J. (1975). Nonlinear aspects of competition between three species. *SIAM journal*  
467 *on applied mathematics*, 29, 243–253.
- 468 Mayfield, M. M. & Levine, J. M. (2010). Opposing effects of competitive exclusion on the phylogenetic  
469 structure of communities. *Ecology letters*, 13, 1085–1093.
- 470 Mayfield, M. M. & Stouffer, D. B. (2017). Higher-order interactions capture unexplained complexity in  
471 diverse communities. *Nature ecology & evolution*, 1, 1–7.
- 472 O’Hara, R. B., Sillanpää, M. J. *et al.* (2009). A review of bayesian variable selection methods: what, how  
473 and which. *Bayesian analysis*, 4, 85–117.
- 474 Ovaskainen, O., Rybicki, J. & Abrego, N. (2019). What can observational data reveal about metacommunity  
475 processes? *Ecography*, 42, 1877–1886.
- 476 Ovaskainen, O., Tikhonov, G., Dunson, D., Grøtan, V., Engen, S., Sæther, B.-E. & Abrego, N. (2017a). How  
477 are species interactions structured in species-rich communities? a new method for analysing time-series  
478 data. *Proceedings of the Royal Society B: Biological Sciences*, 284, 20170768.
- 479 Ovaskainen, O., Tikhonov, G., Norberg, A., Guillaume Blanchet, F., Duan, L., Dunson, D., Roslin, T.  
480 & Abrego, N. (2017b). How to make more out of community data? a conceptual framework and its  
481 implementation as models and software. *Ecology letters*, 20, 561–576.

- 482 Pérez-Ramos, I. M., Matías, L., Gómez-Aparicio, L. & Godoy, Ó. (2019). Functional traits and phenotypic  
483 plasticity modulate species coexistence across contrasting climatic conditions. *Nature communications*,  
484 10, 1–11.
- 485 Picoche, C. & Barraquand, F. (2020). Strong self-regulation and widespread facilitative interactions in  
486 phytoplankton communities. *Journal of Ecology*, 108, 2232–2242.
- 487 Piironen, J., Vehtari, A. *et al.* (2017). Sparsity information and regularization in the horseshoe and other  
488 shrinkage priors. *Electronic Journal of Statistics*, 11, 5018–5051.
- 489 R Core Team (2019). *R: A Language and Environment for Statistical Computing*. R Foundation for Statistical  
490 Computing, Vienna, Austria. URL <https://www.R-project.org/>.
- 491 Ricker, W. E. (1954). Stock and recruitment. *Journal of the Fisheries Board of Canada*, 11, 559–623.
- 492 Schamp, B. S., Arnott, S. E. & Joslin, K. L. (2015). Dispersal strength influences zooplankton co-occurrence  
493 patterns in experimental mesocosms. *Ecology*, 96, 1074–1083.
- 494 Shoemaker, L. G. & Melbourne, B. A. (2016). Linking metacommunity paradigms to spatial coexistence  
495 mechanisms. *Ecology*, 97, 2436–2446.
- 496 Shoemaker, L. G., Sullivan, L. L., Donohue, I., Cabral, J. S., Williams, R. J., Mayfield, M. M., Chase, J. M.,  
497 Chu, C., Harpole, W. S., Huth, A. *et al.* (2020). Integrating the underlying structure of stochasticity into  
498 community ecology. *Ecology*, 101, e02922.
- 499 Spaak, J. W. & De Laender, F. (2020). Intuitive and broadly applicable definitions of niche and fitness  
500 differences. *Ecology letters*, 23, 1117–1128.
- 501 Stachowicz, J. J. (2001). Mutualism, facilitation, and the structure of ecological communities: positive  
502 interactions play a critical, but underappreciated, role in ecological communities by reducing physical or  
503 biotic stresses in existing habitats and by creating new habitats on which many species depend. *Bioscience*,  
504 51, 235–246.
- 505 Stan Development Team (2018). RStan: the R interface to Stan. URL <http://mc-stan.org/>. R package  
506 version 2.18.2.

- 507 Suppiah, R., Hennessy, K., Whetton, P., McInnes, K., Macadam, I., Bathols, J., Ricketts, J. & Page, C.  
508 (2007). Australian climate change projections derived from simulations performed for the ipcc 4th as-  
509 sessment report. *Australian Meteorological Magazine*, 56, 131–152.
- 510 Thompson, P. L., Guzman, L. M., De Meester, L., Horváth, Z., Ptacnik, R., Vanschoenwinkel, B., Viana,  
511 D. S. & Chase, J. M. (2020). A process-based metacommunity framework linking local and regional scale  
512 community ecology. *Ecology letters*, 23, 1314–1329.
- 513 Tilman, D. (1982). *Resource competition and community structure*. Princeton university press.
- 514 Tredennick, A. T., Hooker, G., Ellner, S. P. & Adler, P. B. (2021). A practical guide to selecting models for  
515 exploration, inference, and prediction in ecology. *Ecology*, e03336.
- 516 Uriarte, M., Condit, R., Canham, C. D. & Hubbell, S. P. (2004). A spatially explicit model of sapling growth  
517 in a tropical forest: does the identity of neighbours matter? *Journal of Ecology*, 92, 348–360.
- 518 Van Erp, S., Oberski, D. L. & Mulder, J. (2019). Shrinkage priors for bayesian penalized regression. *Journal*  
519 *of Mathematical Psychology*, 89, 31–50.
- 520 Vellend, M. (2020). *The theory of ecological communities (MPB-57)*, vol. 57. Princeton University Press.
- 521 Wainwright, C. E., HilleRisLambers, J., Lai, H. R., Loy, X. & Mayfield, M. M. (2019). Distinct responses  
522 of niche and fitness differences to water availability underlie variable coexistence outcomes in semi-arid  
523 annual plant communities. *Journal of Ecology*, 107, 293–306.



| Parameter         |                                                        | Distribution                                                           | Unique to                  |
|-------------------|--------------------------------------------------------|------------------------------------------------------------------------|----------------------------|
| $S$               | regional species pool                                  | 15 species                                                             | single value for community |
| $N_{i,0}$         | initial population                                     | Gaussian (mean 80, sd 50) truncated at 0                               | species, plot              |
| $X_e$             | plot environment                                       | Gaussian (mean 0, sd 1)                                                | plot                       |
| $\lambda_{e,i}$   | intrinsic growth with monotonic environmental response | $e^{b_{0,i}+b_{e,i}X_e}$                                               | species                    |
| $b_{0,i}$         | environmentally-independent growth rate                | uniform (0 to 1.5)                                                     | species                    |
| $b_{e,i}$         | environmental response in $\lambda$                    | Gaussian (mean 0, sd 0.5)                                              | species, plot              |
| $\alpha_{e,i,j}$  | competitive interactions with environmental effects    | $e^{\bar{a}_{0,i}+\hat{a}_{0,i,j}+(\bar{a}_{e,i}+\hat{a}_{e,i,j})X_e}$ | species pair, plot         |
| $\bar{a}_{0,i}$   | generic interspecific competition                      | Gaussian (mean -7, sd 0.1)                                             | species pair               |
| $\hat{a}_{0,i,j}$ | deviation in competition                               | uniform $\pm(1.5$ to $3.2)$                                            | 7 species $j$              |
| $\bar{a}_{0,i,i}$ | intraspecific competition                              | -3.5                                                                   | constant                   |
| $\bar{a}_{e,i}$   | generic environmental variation in competition         | Gaussian (mean 0, sd 0.3)                                              | single value for community |
| $\hat{a}_{e,i,j}$ | specific environmental variation in competition        | uniform $\pm(0.5$ to $1.5)$                                            | 7 species $j$              |

Table 1: Parameter components and distributions used in simulations

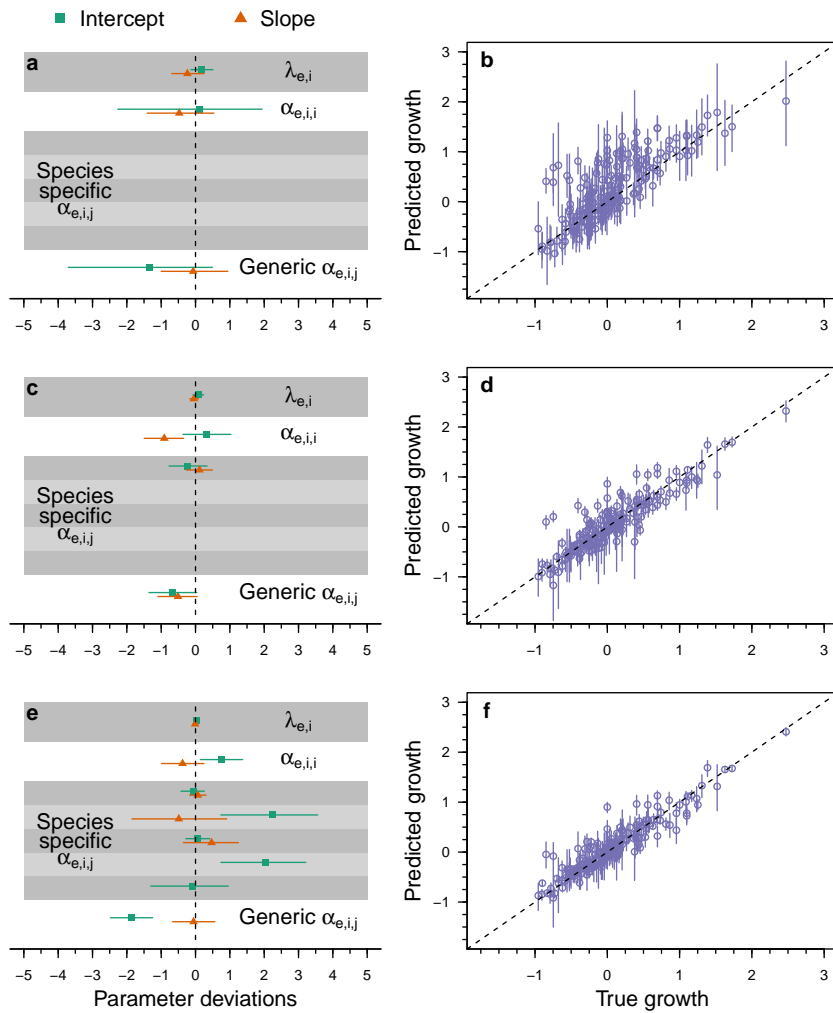

Figure 1: Fitted model parameter estimates and predicted growth rates. We fit the model to simulated data with 10 (a and b), 50 (c and d), and 200 (e and f) full-community and no-competition plots. The left column (a, c, and e) shows the deviation of parameter values from the true value used in the simulations (points are posterior means and lines are 95% credible intervals). The right column (b, d, and f) shows model accuracy of the focal species' growth rate for 200 simulated full-community plots not included in the model fitting. Growth rates were calculated as  $\ln\left(\frac{N_{t+1}}{N_t}\right)$ . The dashed line is the 1-1 line indicating a perfect match. Points show mean estimates and lines are 95% CIs.

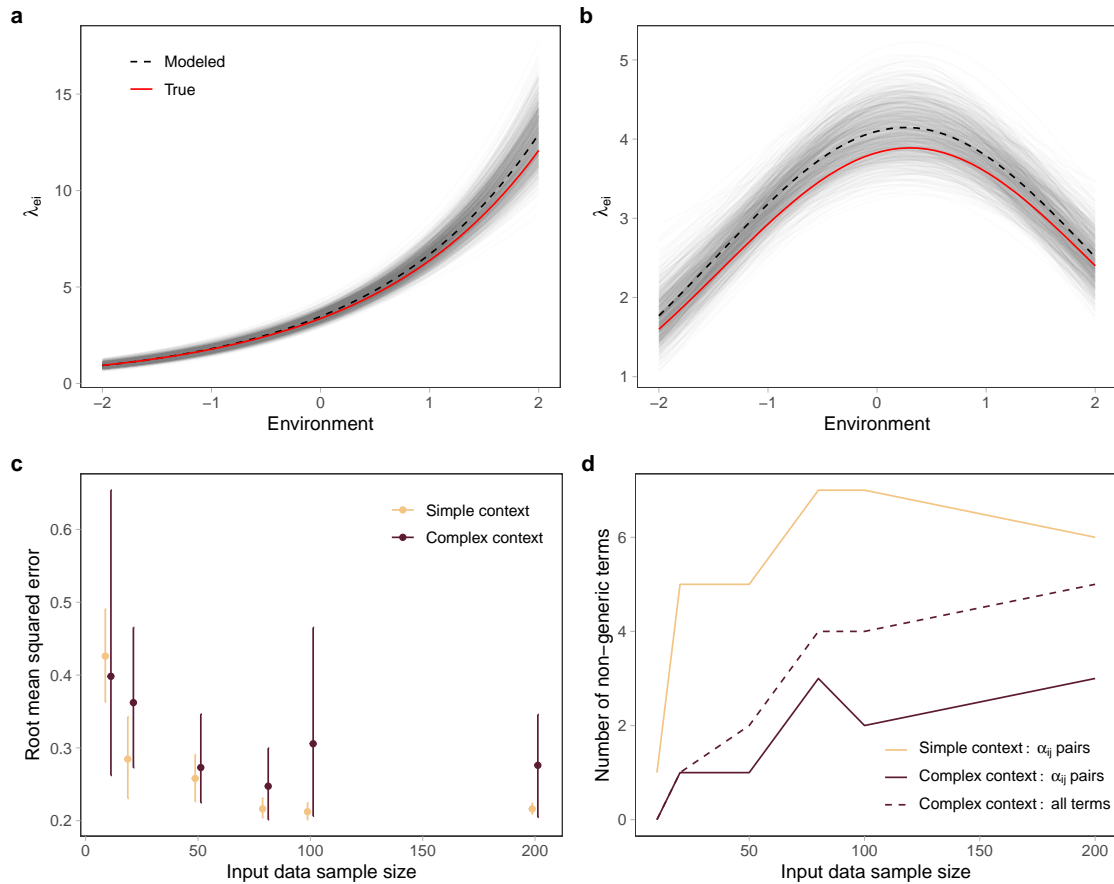

Figure 2: Estimates for  $\lambda_{e,i}$  for simulated data with (A) a monotonic response to the environment and (B) an environmental optimum, with the true values as a solid red line, model means as a dashed black line, and individual model posterior draws as thin grey lines. Both models were run with 50 full community plots and 50 no-competition plots. All growth rate parameters fell within the 95% credible intervals for parameters in both models. (C) Simulated contexts with only  $\alpha_{i,j}$  species pair intercepts compared to contexts with  $\alpha_{e,i,j}$  species pair by environment slopes. Performance of sparse models matching these simulation contexts was measured as RMSE between the model predictions and the true value of 200 out-of-sample data points. Both models predict true growth rates similarly well at low sample sizes (10 samples) but the model of the simpler simulation converges closer to the true values. (D) Number of non-generic terms identified by models on the different  $\alpha$  contexts, which is constrained at larger sample sizes by the global shrinkage parameter  $\tau$ . The model of the species pair intercept only simulation identifies more non-generic  $\alpha_{i,j}$  pairs at all sample sizes. The model of the simulation with both non-generic species pair  $\alpha_{0,i,j}$  intercepts and species pair by environment  $\alpha_{e,i,j}$  slopes requires more data to identify non-generic terms, and those are split between the intercept and slope terms.

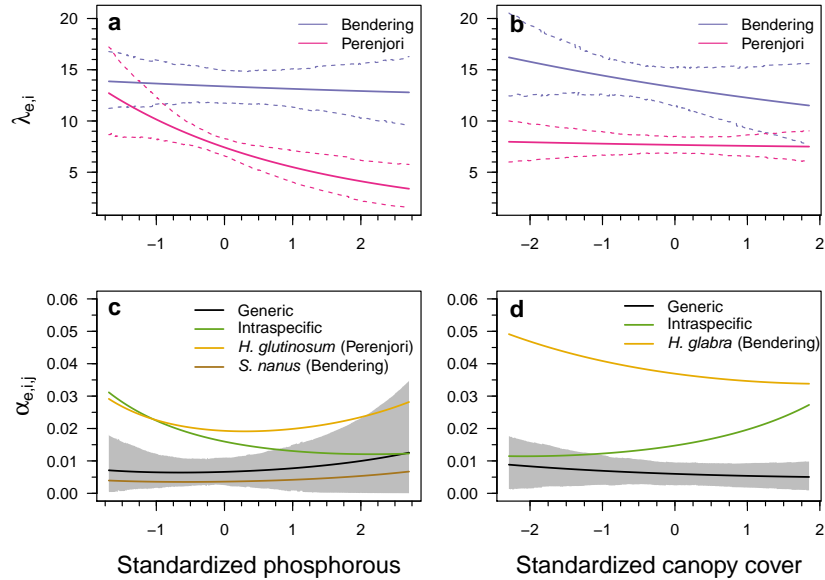

Figure 3: Model estimates for *W. acuminata*. Means (solid lines) and 95% CIs (dashed lines) are shown for  $\lambda_{e,i}$  across a gradient of phosphorous (a) and canopy cover (b). Colors indicate the Bending and Perenjori reserves. The mean (black line) and 95% CI for generic interspecific competition are shown across a phosphorous (c) and canopy cover (d) gradient. In both c and d, the mean intraspecific competition coefficient is shown in green and different species identified by the model as non-generic in each reserve are shown with other colors as indicated in the legends.

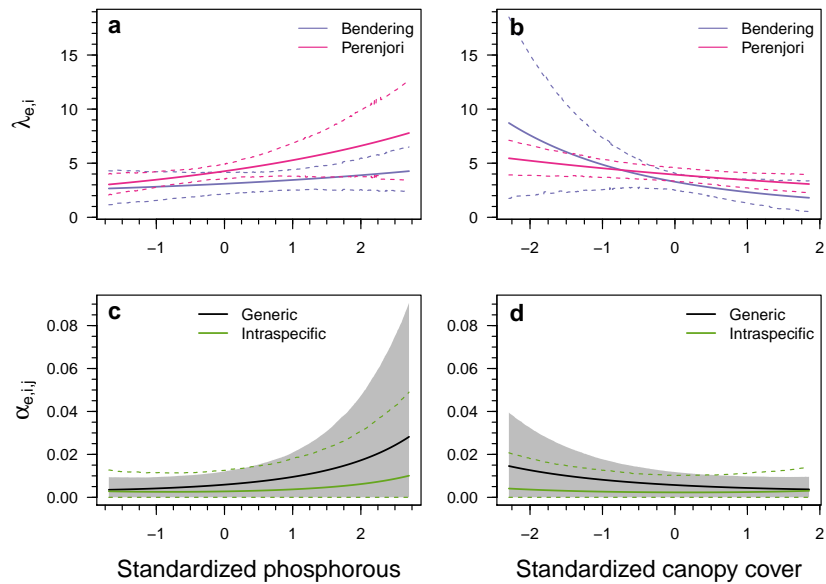

Figure 4: Model estimates for *A. calendula*. Means (solid lines) and 95% CIs (dashed lines) are shown for  $\lambda_{e,i}$  across a gradient of phosphorous (a) and canopy cover (b). Colors indicate the Bending and Perenjori reserves. The mean (black line) and 95% CI for generic interspecific competition are shown across a phosphorous (c) and canopy cover (d) gradient. In both c and d, the mean intraspecific competition coefficient is shown in green with dashed lines indicating the CI. The model did not identify any interspecific competitors in either reserve that impacted *A. calendula* differently from a generic competition coefficient.

## 524 **Box 1: Adapting the sparse modeling method to different ecological** 525 **questions**

526 This sparse modeling method is generalizable to a variety of underlying ecological models. The method's  
527 flexibility allows researchers to pick and choose which parameters to include and how to specify them as  
528 best fits with their study system and questions of interest.

529 For example, the relationship between species' growth rates and the environment can be modeled in  
530 multiple ways. A monotonic relationship would be appropriate for a study concentrated within a small spatial  
531 scale, while a humped-shape relationship would match expectations for a study over a broad environmental  
532 gradient. To demonstrate how our method can be modified for different underlying ecological models, we  
533 simulated environmental responses in growth rate two ways: with a monotonic relationship between species  
534 and the environmental conditions  $\lambda_{e,i}$  and with a curved environmental optimum with a defined niche breadth  
535 for each species  $\lambda_{e,i}^*$ . This resulted in two model formulations:

$$\lambda_{e,i} = e^{b_{0,i} + b_{e,i}X_e} \quad (6)$$

536 in which  $b_{0,i}$  is the mean intrinsic growth rate and  $b_{e,i}$  is the slope of the environmental response, and

$$\lambda_{e,i}^* = b_{max,i} e^{-\left(\frac{z_i - X_e}{2\sigma_i}\right)^2} \quad (7)$$

537 in which  $b_{max,i}$  is the maximum intrinsic growth rate,  $z_i$  is the environmental optimum, and  $\sigma_i$  is the environ-  
538 mental niche breadth (following the parameterization in Thompson *et al.* (2020)). We tested these models  
539 using samples of 50 full community plots and 50 no-competition plots.

540 All growth rate parameters fell within the 95% credible intervals for parameters in both models. In the  
541 monotonic  $\lambda_{e,i}$  model, both the intercept  $b_{0,i}$  and the slope  $b_{e,i}$  deviated from the true values by 3%. In the  
542 optimum  $\lambda_{e,i}^*$  model, the maximum  $b_{max,i}$  deviated from the true value by 6%, the niche breadth  $\sigma_i$  deviated  
543 by 1%, and the location of the environmental optimum  $z_i$  deviated by 13%, which is an absolute difference  
544 of 0.04 (Fig. 2a and b).

545 As a further example, the species interaction components of the model can be adjusted depending on the

546 main research questions of interest. For questions focused on species interactions, modeling interaction co-  
547 efficients independent of environmental conditions would optimize the number of non-generic species pairs  
548 identified from a given sample size of data. We compared a simple simulation with competitive interac-  
549 tions independent of environmental conditions  $\alpha_{i,j}$  to a more complex model with competitive interactions  
550 dependent on the environmental conditions  $\alpha_{e,i,j}$ , and modeled each accordingly. We tested these models  
551 using different sample sizes of full community data points and focal individuals. Both models predicted true  
552 out-of-sample growth rates with average RMSE of  $\approx 0.4$  with only 10 full-community and no-competition  
553 plots. With 80 or more full-community and no-competition plots the simpler model had a RMSE of  $\approx 0.2$   
554 and the model of the more complex simulation had a RMSE of  $\approx 0.25$  (Figure 2c). The simpler model with-  
555 out species-environment interactions highlighted five non-generic  $\hat{a}_{0,i,j}$  species pair interactions with just 50  
556 full-community and no-competition plots. The more complex model highlighted only two non-generic terms  
557 with 50 full-community and no-competition plots. At higher sample sizes the number of non-generic terms  
558 was constrained by the global shrinkage parameter  $\tau$  (Figure 2d)

559 We present these options as launching-off points for researchers to adapt the sparse modeling approach  
560 to their study systems and questions. Even more extensive modifications are possible; for example, replacing  
561 the Beverton-Holt community framework with a different underlying ecological model.
